# Supplementary material
Source: PubMed Central journal article supplement (PMC4102403)
Supplement: NIHMS598885-supplement-Supplementary_Data.pdf [file NIHMS598885-supplement-Supplementary_Data.pdf]

Supplementary Table 1. Characteristics of control participants in the Skin Health Study and their association with indoor tanning behavior.

| Characteristic                      | Never Tan<br>n (%) | Ever Tan<br>n (%) | Crude OR (95% CI) |
|-------------------------------------|--------------------|-------------------|-------------------|
| Total                               | 375 (100)          | 394 (100)         | 769               |
| Age (y)                             |                    |                   |                   |
| 25 – 29                             | 8 (2.1)            | 38 (9.6)          | 7.82 (3.53-17.29) |
| 30 – 29                             | 36 (9.6)           | 91 (23.1)         | 4.16 (2.67-6.49)  |
| 40 – 49                             | 122 (32.5)         | 138 (35.0)        | 1.86 (1.34-2.59)  |
| 50 – 59                             | 209 (55.7)         | 127 (32.2)        | 1.00              |
| Sex                                 |                    |                   |                   |
| Male                                | 214 (57.1)         | 108 (27.4)        | 0.28 (0.21-0.38)  |
| Female                              | 161 (42.9)         | 286 (72.6)        | 1.00              |
| Income                              |                    |                   |                   |
| <\$60,000                           | 122 (32.5)         | 120 (30.5)        | 1.00              |
| \$60,000+                           | 244 (65.0)         | 269 (68.3)        | 1.12 (0.83-1.52)  |
| Completed college                   |                    |                   |                   |
| No                                  | 195 (52)           | 214 (57.1)        | 1.00              |
| Yes                                 | 178 (47.5)         | 180 (48.0)        | 0.92 (0.69-1.22)  |
| Eye color                           |                    |                   |                   |
| Gray/blue                           | 174 (39.2)         | 155 (39.3)        | 0.81 (0.56-1.18)  |
| Green                               | 43 (11.5)          | 61 (15.5)         | 1.29 (0.79-2.11)  |
| Hazel                               | 77 (20.5)          | 89 (22.6)         | 1.05 (0.69-1.62)  |
| Brown                               | 81 (21.6)          | 89 (22.6)         | 1.00              |
| Natural hair color                  |                    |                   |                   |
| Red                                 | 14 (3.7)           | 13 (3.3)          | 1.05 (0.48-2.32)  |
| Blonde                              | 75 (20.0)          | 88 (22.3)         | 1.33 (0.9-1.96)   |
| Light brown                         | 147 (39.2)         | 170 (43.1)        | 1.31 (0.94-1.81)  |
| Dark brown/black                    | 139 (37.1)         | 123 (31.2)        | 1.00              |
| Skin color                          |                    |                   |                   |
| Very fair                           | 52 (13.9)          | 41 (10.4)         | 0.79 (0.26-2.43)  |
| Fair                                | 252 (67.2)         | 280 (71.1)        | 1.11 (0.38-3.21)  |
| Light olive                         | 64 (17.1)          | 66 (16.8)         | 1.03 (0.34-3.11)  |
| Dark olive, brown, black            | 7 (1.9)            | 7 (1.8)           | 1.00              |
| Family History                      |                    |                   |                   |
| No                                  | 285 (76.0)         | 310 (78.7)        | 1.00              |
| Yes                                 | 83 (22.1)          | 74 (18.8)         | 0.82 (0.58-1.17)  |
| Lifetime number of painful sunburns |                    |                   |                   |
| None                                | 40 (10.7)          | 29 (7.4)          | 1.00              |
| 2-Jan                               | 55 (14.7)          | 62 (15.7)         | 1.56 (0.85-2.83)  |
| 3-5                                 | 67 (17.9)          | 75 (19.0)         | 1.54 (0.86-2.76)  |
| >5                                  | 213 (56.8)         | 228 (57.9)        | 1.48 (0.88-2.47)  |
| Phenotype Index                     |                    |                   |                   |
| 1                                   | 35 (9.3)           | 41 (10.4)         | 1.00              |
| 2                                   | 114 (30.4)         | 95 (24.1)         | 0.71 (0.42-1.21)  |
| 3                                   | 151 (40.3)         | 180 (45.7)        | 1.02 (0.62-1.68)  |
| 4                                   | 64 (17.1)          | 75 (19.0)         | 1.00 (0.57-1.75)  |
| 5                                   | 11 (2.9)           | 3 (0.8)           | 0.23 (0.06-0.90)  |
| BMI                                 |                    |                   |                   |
| 18.5 – 24.9                         | 113 (30.1)         | 165 (41.9)        | 1.00              |
| 25.0 – 29.9                         | 140 (37.3)         | 149 (37.8)        | 0.73 (0.52-1.02)  |
| 30.0 +                              | 118 (31.5)         | 73 (18.5)         | 0.42 (0.29-0.62)  |

Supplementary Table 2. SNP frequencies, genotypes, and their association with having ever or never tanned indoors for control participants in the Skin Health Study.

| Gene   | SNP        | Chromosome | Major Allele | Minor Allele | MAF  | HWE    | Case Genotypes n |               |       |     | Control Genotypes n |               |          | Association with Indoor Tanning for Controls |               |                   |          |
|--------|------------|------------|--------------|--------------|------|--------|------------------|---------------|-------|-----|---------------------|---------------|----------|----------------------------------------------|---------------|-------------------|----------|
|        |            |            |              |              |      |        | Major            | Heterozygotes | Minor | MAF | Major               | Heterozygotes | Minor    | MAF                                          | Genetic Model | OR(95%CI)         | p-value* |
| ANKK1  | rs1003641  | 11         | A            | G            | 0.30 | 0.0402 | 422              | 386           | 86    | 386 | 334                 | 49            | Additive | 1.28(1.01,1.62)                              | 0.04          | 1.33(1.04,1.71)   | 0.03     |
| SLC6A3 | rs10040882 | 5          | A            | G            | 0.22 | 0.5991 | 536              | 315           | 43    | 466 | 268                 | 34            | Additive | 0.96(0.75,1.22)                              | 0.71          | 0.95(0.73,1.24)   | 0.70     |
| SLC6A3 | rs10072058 | 5          | G            | A            | 0.00 | 1.0000 | 889              | 5             | 0     | 764 | 5                   | 0             | Dominant | 0.63(0.11,3.81)                              | 0.62          | 0.53(0.07,3.8)    | 0.53     |
| DRD2   | rs10891551 | 11         | A            | G            | 0.15 | 1.0000 | 630              | 246           | 18    | 578 | 178                 | 13            | Dominant | 0.87(0.63,1.21)                              | 0.42          | 0.99(0.69,1.4)    | 0.93     |
| DRD2   | rs10891552 | 11         | A            | T            | 0.03 | 1.0000 | 834              | 60            | 0     | 714 | 54                  | 1             | Dominant | 0.99(0.57,1.71)                              | 0.96          | 1.02(0.56,1.85)   | 0.94     |
| SLC6A3 | rs11133762 | 5          | A            | G            | 0.18 | 0.0005 | 596              | 287           | 4     | 479 | 267                 | 14            | Dominant | 0.88(0.66,1.19)                              | 0.41          | 0.85(0.62,1.17)   | 0.31     |
| ANKK1  | rs11214597 | 11         | A            | G            | 0.02 | 1.0000 | 867              | 27            | 0     | 742 | 27                  | 0             | Additive | 0.88(0.41,1.9)                               | 0.74          | 0.93(0.4,2.17)    | 0.87     |
| DRD2   | rs11214606 | 11         | A            | G            | 0.06 | 0.5097 | 798              | 95            | 1     | 679 | 89                  | 1             | Dominant | 1.05(0.67,1.62)                              | 0.84          | 1.01(0.62,1.62)   | 0.98     |
| SLC6A3 | rs11564773 | 5          | G            | A            | 0.09 | 0.6690 | 734              | 149           | 10    | 628 | 134                 | 5             | Dominant | 1.1(0.76,1.58)                               | 0.63          | 1.19(0.8,1.76)    | 0.39     |
| CYP2A6 | rs11670760 | 19         | G            | A            | 0.28 | 0.3268 | 448              | 378           | 68    | 391 | 323                 | 55            | Additive | 0.88(0.7,1.1)                                | 0.26          | 0.88(0.68,1.12)   | 0.29     |
| CYP2A6 | rs11671041 | 19         | C            | A            | 0.07 | 0.1371 | 770              | 115           | 9     | 672 | 90                  | 6             | Dominant | 1.33(0.86,2.04)                              | 0.20          | 1.45(0.91,2.32)   | 0.12     |
| SLC6A3 | rs11737901 | 5          | A            | G            | 0.31 | 0.0000 | 360              | 517           | 17    | 312 | 430                 | 27            | Additive | 0.83(0.64,1.07)                              | 0.15          | 0.81(0.61,1.07)   | 0.13     |
| CYP2A6 | rs11878604 | 19         | G            | A            | 0.08 | 0.0678 | 749              | 124           | 21    | 661 | 100                 | 8             | Dominant | 0.73(0.48,1.1)                               | 0.13          | 0.75(0.49,1.17)   | 0.21     |
| ANKK1  | rs12360992 | 11         | A            | C            | 0.45 | 0.9415 | 249              | 446           | 198   | 245 | 380                 | 144           | Additive | 1.17(0.96,1.43)                              | 0.13          | 1.21(0.97,1.5)    | 0.09     |
| DRD2   | rs12364283 | 11         | G            | A            | 0.08 | 0.2441 | 743              | 143           | 8     | 667 | 101                 | 1             | Dominant | 0.72(0.47,1.09)                              | 0.12          | 0.83(0.53,1.31)   | 0.43     |
| ANKK1  | rs12422191 | 11         | A            | G            | 0.10 | 0.4178 | 729              | 154           | 11    | 624 | 140                 | 5             | Dominant | 1.6(1.11,2.32)                               | 0.01          | 1.58(1.06,2.35)   | 0.02     |
| SLC6A3 | rs12516758 | 5          | G            | A            | 0.21 | 0.0484 | 546              | 307           | 41    | 473 | 272                 | 24            | Dominant | 1.01(0.75,1.35)                              | 0.96          | 1.03(0.75,1.4)    | 0.87     |
| ANKK1  | rs12794908 | 11         | G            | G            | 0.03 | 1.0000 | 835              | 59            | 0     | 726 | 43                  | 0             | Additive | 0.74(0.4,1.38)                               | 0.34          | 0.78(0.4,1.53)    | 0.48     |
| DRD2   | rs12799083 | 11         | A            | C            | 0.03 | 0.5460 | 838              | 55            | 1     | 721 | 47                  | 1             | Dominant | 1.24(0.69,2.23)                              | 0.47          | 1.24(0.66,2.32)   | 0.51     |
| DRD2   | rs12805897 | 11         | A            | G            | 0.08 | 0.7637 | 750              | 136           | 7     | 671 | 96                  | 2             | Dominant | 0.68(0.44,1.04)                              | 0.08          | 0.76(0.48,1.2)    | 0.23     |
| SLC6A3 | rs13162394 | 5          | C            | G            | 0.27 | 0.8527 | 459              | 371           | 64    | 415 | 302                 | 52            | Additive | 0.97(0.77,1.22)                              | 0.81          | 1.02(0.8,1.31)    | 0.87     |
| SLC6A3 | rs16877324 | 5          | G            | A            | 0.00 | 1.0000 | 890              | 4             | 0     | 768 | 1                   | 0             | Dominant | 0(0,Inf)                                     | 0.98          | 0(0,Inf)          | 0.98     |
| DRD2   | rs17529477 | 11         | A            | G            | 0.32 | 0.1118 | 401              | 398           | 95    | 352 | 351                 | 66            | Additive | 0.9(0.72,1.12)                               | 0.34          | 0.87(0.68,1.11)   | 0.26     |
| DRD2   | rs1799978  | 11         | G            | A            | 0.05 | 0.4802 | 815              | 79            | 0     | 689 | 77                  | 3             | Dominant | 1.25(0.79,2)                                 | 0.34          | 1.25(0.76,2.06)   | 0.38     |
| ANKK1  | rs1800497  | 11         | A            | G            | 0.19 | 0.7213 | 569              | 294           | 31    | 511 | 230                 | 28            | Additive | 0.84(0.65,1.08)                              | 0.17          | 0.82(0.62,1.08)   | 0.15     |
| DRD2   | rs1800499  | 11         | A            | G            | 0.04 | 1.0000 | 833              | 60            | 1     | 706 | 62                  | 1             | Dominant | 1.05(0.63,1.76)                              | 0.85          | 1.11(0.63,1.95)   | 0.72     |
| CYP2A6 | rs1801272  | 19         | A            | T            | 0.03 | 1.0000 | 826              | 64            | 4     | 725 | 44                  | 0             | Dominant | 1.05(0.57,1.92)                              | 0.89          | 1.34(0.69,2.6)    | 0.38     |
| SLC6A3 | rs1973489  | 5          | A            | G            | 0.26 | 0.0063 | 498              | 342           | 54    | 407 | 325                 | 37            | Additive | 1.12(0.88,1.43)                              | 0.35          | 1.15(0.89,1.49)   | 0.30     |
| CYP2A6 | rs2316213  | 19         | A            | G            | 0.00 | 1.0000 | 889              | 5             | 0     | 764 | 5                   | 0             | Dominant | 0.24(0.03,2.12)                              | 0.20          | 0.29(0.03,0.9)    | 0.31     |
| DRD2   | rs2440390  | 11         | A            | G            | 0.13 | 0.1778 | 672              | 211           | 11    | 587 | 175                 | 7             | Dominant | 1.45(1.03,2.03)                              | 0.03          | 1.31(0.91,1.89)   | 0.14     |
| SLC6A3 | rs246995   | 5          | G            | A            | 0.27 | 0.2015 | 479              | 358           | 57    | 402 | 318                 | 49            | Additive | 1.13(0.9,1.43)                               | 0.30          | 1.14(0.89,1.46)   | 0.30     |
| SLC6A3 | rs27048    | 5          | A            | G            | 0.44 | 0.1040 | 258              | 466           | 159   | 226 | 394                 | 134           | Additive | 0.96(0.78,1.19)                              | 0.73          | 0.9(0.72,1.13)    | 0.36     |
| SLC6A3 | rs27072    | 5          | A            | G            | 0.17 | 0.9006 | 624              | 247           | 23    | 524 | 221                 | 24            | Dominant | 0.92(0.68,1.24)                              | 0.59          | 0.93(0.67,1.29)   | 0.65     |
| SLC6A3 | rs27074    | 5          | A            | G            | 0.08 | 0.3494 | 759              | 129           | 6     | 643 | 123                 | 3             | Dominant | 0.87(0.6,1.28)                               | 0.49          | 0.98(0.65,1.49)   | 0.93     |
| DRD2   | rs2734831  | 11         | A            | C            | 0.39 | 0.5362 | 312              | 439           | 143   | 303 | 366                 | 100           | Additive | 1.1(0.89,1.35)                               | 0.39          | 1.13(0.9,1.42)    | 0.28     |
| DRD2   | rs2734836  | 11         | A            | G            | 0.15 | 0.4659 | 635              | 240           | 19    | 559 | 197                 | 13            | Dominant | 0.86(0.63,1.19)                              | 0.37          | 0.89(0.63,1.26)   | 0.52     |
| ANKK1  | rs2734848  | 11         | G            | A            | 0.19 | 0.0586 | 574              | 288           | 31    | 498 | 252                 | 19            | Dominant | 1.45(1.07,1.95)                              | 0.01          | 1.38(1,1.9)       | 0.05     |
| SLC6A3 | rs2735917  | 5          | A            | C            | 0.06 | 0.7173 | 782              | 107           | 5     | 688 | 80                  | 1             | Dominant | 1.03(0.65,1.63)                              | 0.91          | 1.05(0.64,1.74)   | 0.84     |
| SLC6A3 | rs2963253  | 5          | G            | A            | 0.00 | 1.0000 | 890              | 4             | 0     | 767 | 2                   | 0             | Dominant | 0.95(0.06,15.27)                             | 0.97          | 2.62(0.16,43.06)  | 0.50     |
| SLC6A3 | rs2963257  | 5          | A            | G            | 0.48 | 0.9425 | 227              | 479           | 188   | 203 | 383                 | 183           | Additive | 0.95(0.78,1.16)                              | 0.63          | 0.91(0.74,1.13)   | 0.41     |
| SLC6A3 | rs2963259  | 5          | A            | G            | 0.22 | 0.0001 | 571              | 261           | 61    | 488 | 224                 | 56            | Additive | 0.91(0.72,1.14)                              | 0.40          | 0.89(0.7,1.14)    | 0.37     |
| SLC6A3 | rs2963262  | 5          | A            | G            | 0.16 | 0.8982 | 633              | 236           | 25    | 531 | 217                 | 21            | Dominant | 0.8(0.59,1.09)                               | 0.16          | 0.76(0.54,1.06)   | 0.11     |
| SLC6A3 | rs2975292  | 5          | G            | C            | 0.36 | 0.4347 | 352              | 439           | 102   | 308 | 366                 | 95            | Additive | 1.22(0.99,1.51)                              | 0.07          | 1.16(0.92,1.46)   | 0.20     |
| SLC6A3 | rs37022    | 5          | A            | T            | 0.17 | 0.8058 | 631              | 239           | 24    | 521 | 223                 | 25            | Additive | 0.9(0.69,1.17)                               | 0.43          | 0.81(0.61,1.08)   | 0.15     |
| SLC6A3 | rs3776511  | 5          | A            | G            | 0.21 | 0.2168 | 569              | 293           | 32    | 453 | 283                 | 33            | Additive | 0.94(0.74,1.2)                               | 0.63          | 1.01(0.77,1.31)   | 0.96     |
| SLC6A3 | rs3863145  | 5          | A            | G            | 0.27 | 0.0300 | 480              | 352           | 62    | 392 | 331                 | 46            | Additive | 0.96(0.76,1.21)                              | 0.75          | 0.94(0.73,1.21)   | 0.64     |
| DRD2   | rs4245145  | 11         | G            | A            | 0.00 | 1.0000 | 892              | 2             | 0     | 768 | 1                   | 0             | Dominant | 0(0,Inf)                                     | 0.98          | 0(0,Inf)          | 0.98     |
| ERCC6  | rs4253224  | 10         | T            | A            | 0.01 | 0.0000 | 877              | 5             | 11    | 758 | 1                   | 0             | Dominant | 1.68(0.49,5.78)                              | 0.41          | 2.27(0.6,8.52)    | 0.23     |
| DRD2   | rs4436578  | 11         | G            | A            | 0.12 | 0.8526 | 671              | 209           | 14    | 609 | 152                 | 8             | Dominant | 0.85(0.6,1.21)                               | 0.38          | 0.98(0.67,1.43)   | 0.91     |
| SLC6A3 | rs456082   | 5          | G            | A            | 0.20 | 0.2274 | 576              | 285           | 33    | 490 | 241                 | 38            | Additive | 1.12(0.88,1.43)                              | 0.35          | 1.04(0.8,1.35)    | 0.75     |
| CYP2A7 | rs4570984  | 19         | A            | G            | 0.31 | 0.0000 | 458              | 244           | 157   | 413 | 205                 | 119           | Additive | 0.97(0.8,1.17)                               | 0.74          | 0.98(0.8,1.2)     | 0.84     |
| DRD2   | rs4630328  | 11         | A            | G            | 0.37 | 0.6989 | 355              | 414           | 125   | 303 | 364                 | 102           | Additive | 0.88(0.72,1.09)                              | 0.24          | 0.9(0.72,1.13)    | 0.37     |
| SLC6A3 | rs464049   | 5          | G            | A            | 0.42 | 0.7126 | 294              | 449           | 151   | 256 | 371                 | 142           | Additive | 1.07(0.87,1.31)                              | 0.51          | 1.02(0.82,1.26)   | 0.88     |
| DRD2   | rs4648318  | 11         | A            | G            | 0.25 | 0.0107 | 478              | 369           | 47    | 443 | 298                 | 28            | Additive | 1.21(0.94,1.55)                              | 0.14          | 1.23(0.94,1.61)   | 0.13     |
| CYP2A6 | rs4803378  | 19         | G            | A            | 0.00 | 1.0000 | 894              | 0             | 0     | 768 | 1                   | 0             | Dominant | 743543.77(0,Inf)                             | 0.98          | 2886195.26(0,Inf) | 0.98     |
| DRD2   | rs4936274  | 11         | A            | G            | 0.10 | 0.8439 | 711              | 176           | 5     | 621 | 139                 | 8             | Dominant | 1.34(0.93,1.92)                              | 0.12          | 1.24(0.84,1.84)   | 0.28     |
| ANKK1  | rs4938014  | 11         | A            | G            | 0.14 | 0.6343 | 656              | 221           | 17    | 578 | 180                 | 11            | Dominant | 0.83(0.6,1.15)                               | 0.25          | 0.96(0.67,1.37)   | 0.82     |
| SLC6A3 | rs4975636  | 5          | A            | G            | 0.08 | 0.4765 | 748              | 143           | 3     | 647 | 115                 | 7             | Dominant | 0.91(0.62,1.34)                              | 0.62          | 0.73(0.48,1.1)    | 0.14     |
| SLC6A3 | rs6347     | 5          | G            | A            | 0.28 | 0.7244 | 475              | 356           | 60    | 384 | 318                 | 67            | Additive | 0.88(0.7,1.1)                                | 0.27          | 0.91(0.72,1.16)   | 0.46     |
| CYP2A7 | rs6508950  | 19         | A            | G            | 0.08 | 0.0010 | 766              | 120           | 5     | 651 | 101                 | 13            | Dominant | 1.12(0.75,1.67)                              | 0.58          | 1.33(0.86,2.06)   | 0.20     |
| SLC6A3 | rs6869645  | 5          | A            | G            | 0.01 | 0.0000 | 887              | 4             | 3     | 764 | 1                   | 4             | Dominant | 0.63(0.11,3.81)                              | 0.62          | 0.49(0.07,3.33)   | 0.46     |
| ANKK1  | rs7122884  | 11         | T            | A            | 0.00 | 1.0000 | 892              | 2             | 0     | 763 | 6                   | 0             | Dominant | 0.95(0.19,4.74)                              | 0.95          | 0.94(0.18,4.92)   | 0.94     |
| ANKK1  | rs7123797  | 11         | A            | G            | 0.37 | 0.0000 | 393              | 317           | 182   | 358 | 284                 | 126           | Additive | 1.19(0.98,1.44)                              | 0.08          | 1.2(0.98,1.48)    | 0.08     |
| DRD2   | rs7131056  | 11         | A            | C            | 0.44 | 0.3067 | 288              | 448           | 158   | 229 | 395                 | 145           | Additive | 1.07(0.87,1.31)                              | 0.53          | 1.01(0.81,1.26)   | 0.95     |
| CYP2A6 | rs7246742  | 19         | C            | A            | 0.14 | 0.5170 | 659              | 217           | 18    | 583 | 176                 | 10            | Dominant | 1.02(0.73,1.42)                              | 0.91          | 1.08(0.76,1.55)   | 0.66     |
| CYP2A6 | rs7251418  | 19         | A            | G            | 0.27 | 0.6395 | 459              | 364           | 71    | 418 | 302                 | 49            | Additive | 0.87(0.69,1.1)                               | 0.24          | 0.83(0.65,1.07)   | 0.15     |
| CYP2A6 | rs7255443  | 19         | A            | G            | 0.08 | 0.0146 | 769              | 119           | 5     | 651 | 106                 | 11            | Dominant | 1.13(0.76,1.68)                              | 0.53          | 1.36(0.88,2.1)    | 0.16     |
| CYP2A6 | rs8192729  | 19         | A            | G            | 0.08 | 0.0306 | 771              | 118           | 5     | 652 | 107                 | 10            | Dominant | 1.04(0.7,1.55)                               | 0.83          | 1.28(0.83,1.98)   | 0.26     |

\* p-value, crude;

\* p-value, adjusted for age and sex

Supplementary Table 3. Association of Haplotypes with having ever or never tanned indoors for control participants in the Skin Health Study.

| Gene                                                                               | SNPs                                                                | haplotype                                                                                                      | Freq.     | OR(95%CI)       | p-value* | Adj OR(95%CI)   | p-value† |                 |      |
|------------------------------------------------------------------------------------|---------------------------------------------------------------------|----------------------------------------------------------------------------------------------------------------|-----------|-----------------|----------|-----------------|----------|-----------------|------|
| ANKK1                                                                              | rs12360992,<br>rs4938014                                            | AG                                                                                                             | 0.32      | 1.26(1.01,1.58) | 0.04     | 1.23(0.97,1.57) | 0.09     |                 |      |
|                                                                                    |                                                                     | AA                                                                                                             | 0.13      | 0.92(0.68,1.25) | 0.61     | 1.05(0.75,1.46) | 0.79     |                 |      |
|                                                                                    |                                                                     | CG                                                                                                             | 0.54      | 0.88(0.72,1.08) | 0.23     | 0.85(0.68,1.06) | 0.15     |                 |      |
| ANKK1                                                                              | rs2734848,<br>rs1800497,<br>rs12794908,<br>rs1003641,<br>rs12422191 | AAGGG                                                                                                          | 0.19      | 0.84(0.65,1.09) | 0.19     | 0.82(0.62,1.08) | 0.16     |                 |      |
|                                                                                    |                                                                     | AGGGG                                                                                                          | 0.47      | 0.95(0.78,1.17) | 0.64     | 0.93(0.75,1.16) | 0.52     |                 |      |
|                                                                                    |                                                                     | AGGAG                                                                                                          | 0.11      | 0.89(0.63,1.25) | 0.50     | 1.05(0.73,1.51) | 0.80     |                 |      |
|                                                                                    |                                                                     | AGAGG                                                                                                          | 0.03      | 0.74(0.40,1.38) | 0.34     | 0.78(0.40,1.53) | 0.47     |                 |      |
|                                                                                    |                                                                     | GGGAG                                                                                                          | 0.09      | 1.25(0.87,1.80) | 0.22     | 1.13(0.77,1.68) | 0.53     |                 |      |
|                                                                                    |                                                                     | GGGAA                                                                                                          | 0.09      | 1.69(1.17,2.44) | 0.01     | 1.68(1.13,2.50) | 0.01     |                 |      |
|                                                                                    |                                                                     | rs11670760,<br>rs7251418,<br>rs7246742,<br>rs8192729,<br>rs2316213,<br>rs1801272,<br>rs11671041,               |           |                 |          |                 |          |                 |      |
| CYP2A6                                                                             | rs7255443                                                           | AGAAGTAA                                                                                                       | 0.06      | 1.16(0.77,1.73) | 0.48     | 1.37(0.88,2.14) | 0.16     |                 |      |
|                                                                                    |                                                                     | AGAGGTAG                                                                                                       | 0.24      | 1.27(1.01,1.62) | 0.05     | 1.21(0.93,1.56) | 0.15     |                 |      |
|                                                                                    |                                                                     | AGCGGTAG                                                                                                       | 0.07      | 0.82(0.55,1.22) | 0.33     | 0.87(0.57,1.33) | 0.52     |                 |      |
|                                                                                    |                                                                     | AGCGGTCG                                                                                                       | 0.06      | 1.33(0.85,2.07) | 0.21     | 1.40(0.87,2.27) | 0.17     |                 |      |
|                                                                                    |                                                                     | AAAGGTAG                                                                                                       | 0.24      | 0.87(0.69,1.11) | 0.27     | 0.81(0.62,1.04) | 0.10     |                 |      |
|                                                                                    |                                                                     | AAAGGAAG                                                                                                       | 0.03      | 1.09(0.50,2.35) | 0.83     | 1.29(0.56,2.95) | 0.55     |                 |      |
|                                                                                    |                                                                     | GGAAGTAA                                                                                                       | 0.01      | 1.28(0.45,3.63) | 0.65     | 1.69(0.55,5.20) | 0.36     |                 |      |
|                                                                                    |                                                                     | GGAGGTAG                                                                                                       | 0.26      | 0.84(0.67,1.07) | 0.16     | 0.82(0.63,1.06) | 0.13     |                 |      |
|                                                                                    |                                                                     | rs2440390,<br>rs1800499,<br>rs2734836,<br>rs2734831,<br>rs12799083,<br>rs4436578,<br>rs11214606,<br>rs4648318, |           |                 |          |                 |          |                 |      |
|                                                                                    |                                                                     | DRD2                                                                                                           | rs4245145 | GGAACAGAA       | 0.14     | 0.89(0.67,1.20) | 0.46     | 0.91(0.66,1.25) | 0.55 |
|                                                                                    |                                                                     |                                                                                                                |           | GGGACGGGA       | 0.11     | 0.91(0.65,1.28) | 0.58     | 1.04(0.72,1.50) | 0.85 |
|                                                                                    |                                                                     |                                                                                                                |           | GGCCAGAA        | 0.48     | 0.92(0.75,1.13) | 0.41     | 0.90(0.72,1.12) | 0.34 |
|                                                                                    |                                                                     |                                                                                                                |           | GGCCAAAA        | 0.06     | 1.07(0.69,1.65) | 0.77     | 1.02(0.64,1.63) | 0.93 |
| GGCCGAGAA                                                                          | 0.03                                                                |                                                                                                                |           | 1.17(0.66,2.07) | 0.59     | 1.16(0.63,2.13) | 0.64     |                 |      |
| GAGCCAGAA                                                                          | 0.04                                                                |                                                                                                                |           | 1.06(0.63,1.77) | 0.83     | 1.09(0.61,1.92) | 0.78     |                 |      |
| AGGACAGGA                                                                          | 0.12                                                                |                                                                                                                |           | 1.54(1.10,2.15) | 0.01     | 1.41(0.98,2.02) | 0.06     |                 |      |
| rs7131056,<br>rs4936274,<br>rs10891551,<br>rs10891552,<br>rs4630328,<br>rs1799978, |                                                                     |                                                                                                                |           |                 |          |                 |          |                 |      |
| DRD2                                                                               | rs12364283                                                          |                                                                                                                |           | AGGTGAA         | 0.33     | 0.95(0.77,1.18) | 0.64     | 0.91(0.72,1.15) | 0.44 |
|                                                                                    |                                                                     | AAGTGAA                                                                                                        | 0.10      | 1.34(0.95,1.88) | 0.09     | 1.24(0.86,1.78) | 0.26     |                 |      |
|                                                                                    |                                                                     | CGATGAG                                                                                                        | 0.07      | 0.71(0.47,1.09) | 0.12     | 0.79(0.50,1.25) | 0.32     |                 |      |
|                                                                                    |                                                                     | CGATGAA                                                                                                        | 0.04      | 1.52(0.86,2.68) | 0.15     | 1.70(0.92,3.14) | 0.09     |                 |      |
|                                                                                    |                                                                     | CGAAGAA                                                                                                        | 0.03      | 1.07(0.61,1.87) | 0.80     | 1.14(0.62,2.09) | 0.67     |                 |      |
|                                                                                    |                                                                     | CGGTGGA                                                                                                        | 0.05      | 1.25(0.79,1.98) | 0.33     | 1.23(0.75,2.01) | 0.41     |                 |      |
|                                                                                    |                                                                     | CGGTAAA                                                                                                        | 0.37      | 0.90(0.73,1.11) | 0.31     | 0.91(0.73,1.14) | 0.42     |                 |      |
|                                                                                    |                                                                     | rs246995,<br>rs13162394,<br>rs2963262,<br>rs16877324,<br>rs2963257,                                            |           |                 |          |                 |          |                 |      |
|                                                                                    |                                                                     | SLC6A3                                                                                                         | rs1973489 | ACGAGG          | 0.01     | 1.51(0.45,5.10) | 0.50     | 1.48(0.40,5.56) | 0.56 |
|                                                                                    |                                                                     |                                                                                                                |           | ACGAAG          | 0.25     | 0.96(0.76,1.21) | 0.73     | 1.00(0.78,1.30) | 0.98 |
|                                                                                    |                                                                     |                                                                                                                |           | ACGAAA          | 0.01     | 0.96(0.29,3.20) | 0.94     | 1.10(0.29,4.18) | 0.89 |
| AGGAGG                                                                             | 0.27                                                                |                                                                                                                |           | 1.02(0.82,1.29) | 0.83     | 1.00(0.78,1.28) | 0.99     |                 |      |
| AGAAAG                                                                             | 0.16                                                                |                                                                                                                |           | 0.81(0.61,1.07) | 0.14     | 0.78(0.58,1.06) | 0.11     |                 |      |
| GGGAGA                                                                             | 0.02                                                                |                                                                                                                |           | 1.51(0.62,3.68) | 0.36     | 1.62(0.62,4.24) | 0.33     |                 |      |
| GGGAAG                                                                             | 0.03                                                                |                                                                                                                |           | 0.99(0.56,1.73) | 0.97     | 0.92(0.50,1.68) | 0.78     |                 |      |
| GGGAAA                                                                             | 0.21                                                                |                                                                                                                |           | 1.10(0.85,1.43) | 0.46     | 1.13(0.86,1.50) | 0.38     |                 |      |
| rs3776511,<br>rs10072058,                                                          |                                                                     |                                                                                                                |           |                 |          |                 |          |                 |      |
| SLC6A3                                                                             | rs6347                                                              | GAA                                                                                                            | 0.72      | 1.10(0.89,1.38) | 0.38     | 1.06(0.84,1.35) | 0.63     |                 |      |

|        |             |       |                 |                 |                 |                 |      |
|--------|-------------|-------|-----------------|-----------------|-----------------|-----------------|------|
|        | GAG         | 0.07  | 0.87(0.58,1.29) | 0.48            | 0.83(0.54,1.28) | 0.41            |      |
|        | AAG         | 0.21  | 0.93(0.72,1.19) | 0.55            | 0.99(0.76,1.29) | 0.92            |      |
|        | rs10040882, |       |                 |                 |                 |                 |      |
|        | rs2975292,  |       |                 |                 |                 |                 |      |
|        | rs2735917,  |       |                 |                 |                 |                 |      |
|        | rs464049,   |       |                 |                 |                 |                 |      |
| SLC6A3 | rs456082    | ACCGA | 0.21            | 0.98(0.76,1.26) | 0.88            | 0.99(0.75,1.30) | 0.93 |
|        |             | GCCAA | 0.42            | 0.89(0.73,1.10) | 0.28            | 0.94(0.75,1.17) | 0.57 |
|        |             | GGCGG | 0.20            | 1.15(0.90,1.47) | 0.25            | 1.07(0.82,1.40) | 0.60 |
|        |             | GGCAA | 0.10            | 1.18(0.83,1.67) | 0.35            | 1.20(0.83,1.75) | 0.33 |
|        |             | GGAAA | 0.06            | 1.07(0.68,1.70) | 0.76            | 1.06(0.64,1.76) | 0.81 |

\* P-value, crude;

\* P-value, adjusted for age and sex
